# Supplementary material for: A three-dimensional in vitro model of tumor cell intravasation
Source: Royal Society of Chemistry journal article supplement (doi:10.1039/c3ib40170g), 2014-01-01
Supplement: c3ib40170g1.pdf [file c3ib40170g1.pdf]

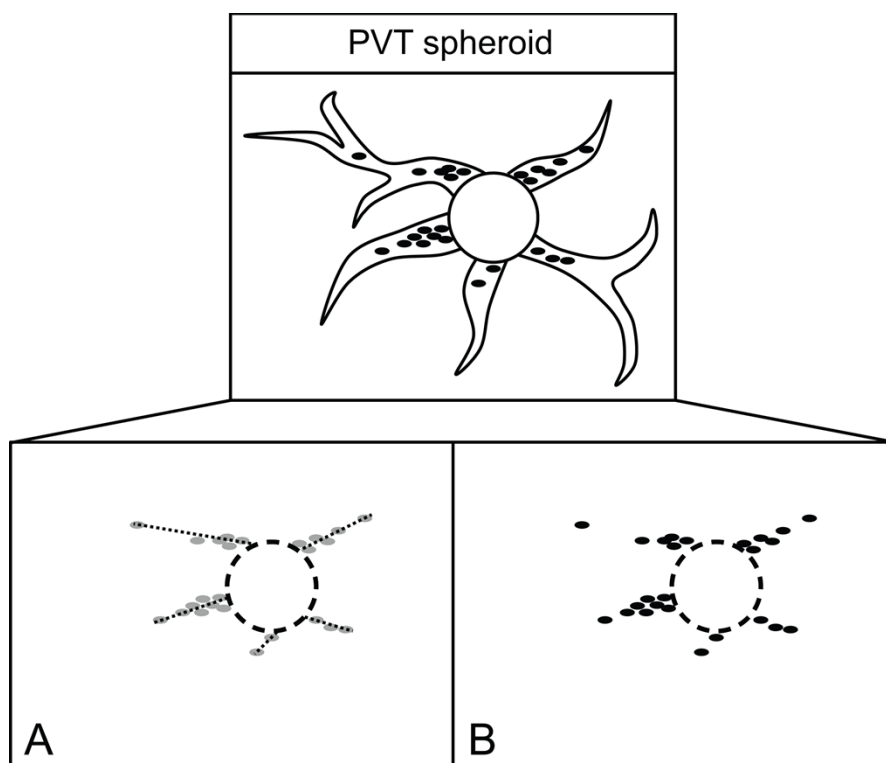

**Supplementary Fig. 1** Tumor cell intravasation was characterized by Migration Length (dotted lines in A) and Migration Area (black area in B). For both parameters, only cells present beyond the surface boundary of the spheroid (dashed lines in A, B) were analyzed.

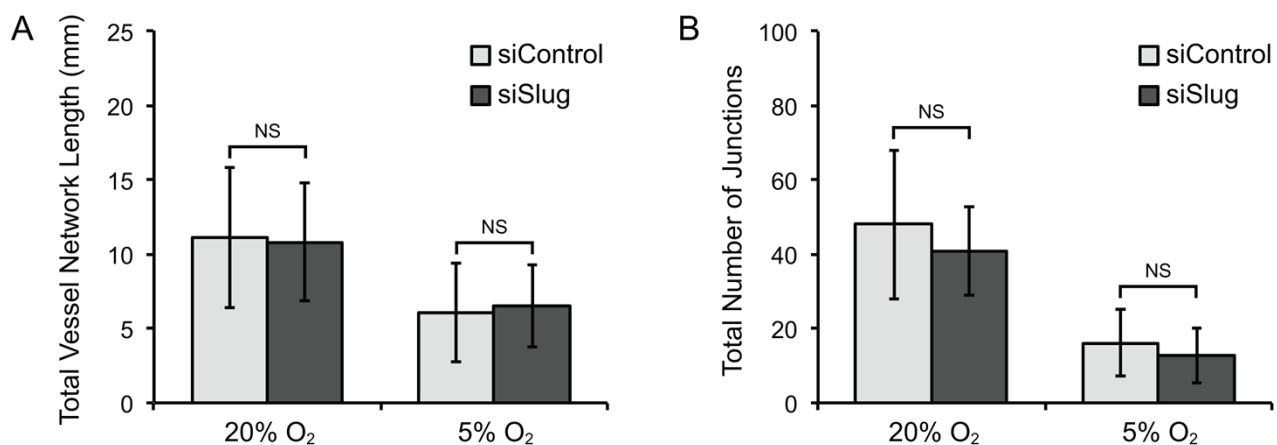

**Supplementary Fig. 2** Effect of siSlug on sprouting angiogenesis. PVT spheroids that contained SW620 cells transfected with siRNA targeting Slug (siSlug) or Control (siControl) were cultured in either 20% or 5% O<sub>2</sub> for 7 days. Resulting vessel networks were quantified for (A) Total vessel network length and (B) Total number of junctions. There was no significant difference found between siSlug and siControl conditions at each oxygen level. Error bars represent standard deviation for each condition. NS: no statistically significant difference between conditions.
